# Supplementary material for: A Spectral Graph Regression Model for Learning Brain Connectivity of Alzheimer’s Disease
Source: PubMed Central journal article supplement (PMC4449104; doi:10.1371/journal.pone.0128136), 2015-05-29
Supplement: pone.0128136.s001.pdf [file pone.0128136.s001.pdf]

## S1 Appendix

For weighted networks, the generalized clustering coefficient  $C_{wu}$  [1] and the global efficiency  $E_{global}$  [2] are defined as follows

$$C_{wu} = \frac{1}{p} \sum_i \frac{1}{D_{ii}(D_{ii} - 1)} \sum_{j,k} (W_{ij}W_{ik}W_{jk})^{1/3}, \quad (S1)$$

$$E_{global} = \frac{1}{N(N-1)} \sum_{i \neq j} \frac{1}{l_{ij}}, \quad (S2)$$

where  $D_{ii} = \sum_j W_{ij}$  is the degree of vertex  $i$ ;  $l_{ij}$  is the shortest weighted path length between vertices  $i$  and  $j$ ;  $N$  denotes the number of vertices in the network. Notice that the subscript ‘ $wu$ ’ indicates a weighted undirected network.

There are multiple ways of specifying the modularity. One way to define the modularity of a partition of the network into  $c$  communities is [3]

$$Q = \sum_{i=1}^c (e_{ii} - a_i^2), \quad (S3)$$

where  $e_{ii}$  is the fraction of edges with both end vertices in the same community  $i$  and  $a_i$  is the fraction of ends of edges adjacent to vertices in community  $i$ . If we define  $B_{ij}$  as the difference between  $W_{ij}$  and the expected weight between vertices  $i$  and  $j$  if edge weights are distributed at random, then the modularity can also be viewed as the normalized summation of  $B_{ij}$  over all pairs of  $i, j$  that are in a same community.

## References

1. Saramäki J, Kivela M, Onnela JP, Kaski K, Kertesz J. Generalizations of the clustering coefficient to weighted complex networks. *Physical Review E*. 2007;75(2):027105.
2. Achard S, Bullmore E. Efficiency and cost of economical brain functional networks. *PLoS Computational Biology*. 2007;3(2):e17.
3. Newman ME. Modularity and community structure in networks. *Proceedings of the National Academy of Sciences*. 2006;103(23):8577–8582.
